# Supplementary material
Source: PubMed Central journal article supplement (PMC8084608)
Supplement: mmc1.pdf [file mmc1.pdf]

## A meta-analysis of intravenous immunoglobulin to control COVID-19 patients

*Huai Rong Xiang, Xuan Cheng, Yun Li, Wen wen Luo, Wen xing peng***Citation**

Huai Rong Xiang, Xuan Cheng, Yun Li, Wen wen Luo, Wen xing peng. A meta-analysis of intravenous immunoglobulin to control COVID-19 patients. PROSPERO 2021 CRD42021238498 Available from: [https://www.crd.york.ac.uk/prospERO/display\\_record.php?ID=CRD42021238498](https://www.crd.york.ac.uk/prospERO/display_record.php?ID=CRD42021238498)

**Review question**

The aim of this meta-analysis of randomized controlled trials is to evaluate the efficacy and safety of Intravenous immunoglobulin for COVID-19 patients.

**Searches**

Searched Web of Science, PubMed, Embase, the Cochrane Library, medRxiv for RCTs and observational studies. The search words used included: "Coronavirus Disease 2019" OR "COVID-19" OR "SARS-Cov-2" OR "2019-nCoV Diseases" OR "COVID 19 Virus Infection" AND "Intravenous immunoglobulin," OR "immunoglobulin," OR "IVIG". Search were down on February 17, 2021. The search did not impose restriction on the date between 01.01.2020 to 02.17 2021. No restriction on the geographical location or language of the studies.

**Types of study to be included**

RCT; retrospective cohort study

**Condition or domain being studied**

In 2019, a novel coronavirus disease (COVID-19) which caused by the severe acute respiratory syndrome coronavirus 2 (SARS-Cov-2) has aroused an outbreak worldwide. The high infectivity and mortality pose an unprecedented challenge to clinicians. Numerous clinical trials, retrospective studies and observational studies about SARS-Cov-2 disease are underway. Due to the lack of sufficient / significant conclusive evidence, it is difficult to get a consensus on the treatment until now.

The SARS-Cov-2 virus is a member of coronavirus family. Base on the experience of treating previous coronavirus diseases such as severe acute respiratory syndrome (SARS), middle east respiratory syndrome(MERS) and H1N12009, [1] it might be believed that intravenous immunoglobulins (IVIGs) could be used in COVID-19 patients and be one of worthwhile treatments. IVIGs are blood product from healthy donors containing a polyclonal IgG antibodies. They, known for its anti-inflammatory reactions, has been used to treat patients with inflammatory diseases including Kawasaki disease, multiple sclerosis. The controversy over the efficacy of IVIGs for improving in clinical symptoms and mortality, however, has been occurring with the increasing number of patients.

**Participants/population**

Patients with lab-confirmed COVID-19 , aged 18 years and above

**Intervention(s), exposure(s)**

Treatment group?IVIg four vials of 5 gm5 IVIg daily for three consecutive days + standard of care

**Comparator(s)/control**

Another standard of care intervention without Intravenous immunoglobulin or a placebo control group

**Main outcome(s)**

Treatment duration; morality, mechanical ventilation admission, hospital or ICU duration?

**\* Measures of effect**

Relative risks, odds ratios, standardized mean difference

### Additional outcome(s)

Laboratory indicators, number of people getting better

#### \* Measures of effect

Relative risks, odds ratios, standardized mean difference

### Data extraction (selection and coding)

We will extract the following data from the randomized controlled studies (RCTs), case-control studies (CCSs), retrospective cohort studies (RCSs):

- 1) title, author name, publication data,
- 2) number of patients, study design (including grouping, blinding, etc.),
- 3) information on interventions)
- 4) outcome indicators and their measurement,
- 5) adverse reactions, and adverse events

Data will then be extracted and entered into a pre-defined and piloted microsoft excel database.

The data will be extracted by one reviewer, and independently checked by a second reviewer.

Any discrepancies will be identified and resolved through discussion (with a third author, if necessary).

### Risk of bias (quality) assessment

Two authors independently evaluate the quality of the literature. If there are differences in the evaluation results, they will be resolved in consultation with the third author. If the included study is a randomized controlled study, the biased risk assessment tool of the Cochrane Collaboration Network will be used to evaluate the methodological quality of the study, from the aspects of random sequence generation, concealment of allocation schemes, blinding, completeness of outcome data, and selective reporting to assess the risk of bias, there are three types of evaluation results for each item, namely low risk, high risk, and unclear. If the included study is Case-Control Studies (CCSs), Newcastle-Ottawa Scale (NOS) is used to evaluate the methodological quality of the study, and the score is evaluated in terms of patient selection, comparability between groups, and research results. The higher the score, the study higher the quality.

Sensitivity analyses will be conducted to assess the effects of the exclusion of studies at high risk of bias influences the findings.

### Strategy for data synthesis

We used RevMan 5.4 to conduct all statistical analysis. Funnel plot was used to assess the possible of publication bias. Statistical heterogeneity was evaluated by The  $I^2$  test. According to the Cochran's Handbook for the systematical reviews of intervention, if  $I^2$  value of 0% to 40%, 30% to 60%, 50% to 90%, 75% to 100% considered as not important, moderate, substantial and considerable level of heterogeneity, respectively. When was  $I^2$  was 0-60?, we used a fix-effect model to pool the results, or else a random-effects model. The select indicators were count data and measurement data. We used either relative risk (RR) or standardized mean difference (SMD) with 95% confidence interval (CI).

### Analysis of subgroups or subsets

APACH II score: moderate type, severe type, critical type

### Contact details for further information

Huai Rong Xiang  
xianghuairong123@163.com

### Organisational affiliation of the review

None

### Review team members and their organisational affiliations

Miss Huai Rong Xiang. Department of Pharmacy, the Second Xiangya Hospital, Central South University, Changsha, Hunan , China

Mr Xuan Cheng. Department of Pharmacy, the Second Xiangya Hospital, Central South University, Changsha, Hunan , China

Miss Yun Li. Department of Pharmacy, the Second Xiangya Hospital, Central South University, Changsha, Hunan , China

Miss Wen wen Luo. Department of Pharmacy, the Second Xiangya Hospital, Central South University, Changsha, Hunan , China

Professor Wen xing peng. Department of Pharmacy, the Second Xiangya Hospital, Central South University, Changsha, Hunan , China

### Type and method of review

Meta-analysis, Systematic review

### Anticipated or actual start date

12 February 2021

### Anticipated completion date

22 March 2021

### Funding sources/sponsors

Pwx Group in Department of Pharmacy in the Second Xiangya Hospital Central South University

### Conflicts of interest

### Language

English

### Country

China

### Stage of review

Review Ongoing

### Subject index terms status

Subject indexing assigned by CRD

### Subject index terms

COVID-19; Humans; Immunoglobulins, Intravenous; SARS-CoV-2

### Date of registration in PROSPERO

23 February 2021

### Date of first submission

21 February 2021

### Stage of review at time of this submission

| Stage                                                           | Started | Completed |
|-----------------------------------------------------------------|---------|-----------|
| Preliminary searches                                            | Yes     | No        |
| Piloting of the study selection process                         | Yes     | No        |
| Formal screening of search results against eligibility criteria | Yes     | No        |
| Data extraction                                                 | No      | No        |
| Risk of bias (quality) assessment                               | No      | No        |
| Data analysis                                                   | No      | No        |

### Revision note

#27 add "Sensitivity analyses will be conducted to assess the effects of the exclusion of studies at high risk of bias influences the findings."

*The record owner confirms that the information they have supplied for this submission is accurate and complete and they understand that deliberate provision of inaccurate information or omission of data may be construed as scientific misconduct.*

*The record owner confirms that they will update the status of the review when it is completed and will add publication details in due course.*

### Versions

23 February 2021

24 February 2021

### PROSPERO

This information has been provided by the named contact for this review. CRD has accepted this information in good faith and registered the review in PROSPERO. The registrant confirms that the information supplied for this submission is accurate and complete. CRD bears no responsibility or liability for the content of this registration record, any associated files or external websites.
